# Supplementary material for: Phylogenetic comparative analysis of electric communication signals in ghost knifefishes (Gymnotiformes: Apteronotidae)
Source: Oxford University Press journal article supplement (doi:10.1242/jeb.007930), 2007-11-19
Supplement: jeb007930-tabless1-s2.pdf [file jeb007930-tabless1-s2.pdf]

Table S1. *Size and sex of subjects*

| Species                                           | N  | Mass (g)  | Length (cm) | Sex                      |
|---------------------------------------------------|----|-----------|-------------|--------------------------|
| <i>Sternarchorhynchus</i> cf. <i>curvirostris</i> | 7  | 0.4–4.1   | 5.0–16.4    | 2 female, 5 N.D.         |
| <i>Sternarchorhynchus</i> cf. <i>roseni</i>       | 8  | 7.6–17.1  | 15–20       | 1 female, 2 male, 5 N.D. |
| <i>Parapteronotus</i> <i>hasemani</i> (Peru)      | 10 | 2.7–17.7  | 9.1–16.8    | 2 female, 2 male, 6 N.D. |
| <i>Parapteronotus</i> <i>hasemani</i> (Brazil)    | 4  | 2.6–12.4  | 11.3–21.5   | 1 female, 1 male, 2 N.D. |
| ‘ <i>Apteronotus</i> ’ <i>bonapartii</i>          | 10 | 10.6–64.7 | 13–32       | 4 female, 6 male         |
| ‘ <i>Apteronotus</i> ’ n. sp. B                   | 1  | 1.8       | 8           | N.D.                     |
| <i>Sternarchogiton</i> <i>nattereri</i>           | 9  | 3.4–30.9  | 11.9–24.0   | 4 female, 2 male, 3 N.D. |
| <i>Sternarchogiton</i> <i>porcinum</i>            | 1  | 39.2      | 27          | N.D.                     |
| <i>Porotergus</i> <i>gimbeli</i> (Peru)           | 7  | 3.0–6.2   | 9.8–13.0    | 1 male, 6 N.D.           |
| <i>Porotergus</i> <i>gimbeli</i> (Brazil)         | 2  | 1.7–3.2   | 10.6–10.7   | N.D.                     |
| <i>Sternarchella</i> <i>terminalis</i>            | 5  | 0.5–3.4   | 5.5–11.7    | N.D.                     |
| <i>Adontosternarchus</i> <i>balaenops</i>         | 10 | 3.5–11.75 | 11.1–16.4   | 3 female, 2 male, 5 N.D. |

N.D.=not determined; sex of some individuals was not determined because they were not morphologically sexually dimorphic and the fish were either not sacrificed to determine sex or the fish died and the sex was not determined at the time of death.

Table S2. *Contributions of EOD, chirp and GFR factors to discriminant function analysis*

| Factor         | Partial Wilks Lambda <sup>1</sup> | F-to-remove <sup>2</sup> |
|----------------|-----------------------------------|--------------------------|
| Chirp factor 1 | 0.126                             | 31.44***                 |
| EOD factor 1   | 0.133                             | 29.73***                 |
| EOD factor 2   | 0.155                             | 24.71***                 |
| Chirp factor 2 | 0.319                             | 9.72***                  |
| Chirp factor 6 | 0.404                             | 6.70**                   |
| EOD factor 3   | 0.426                             | 6.12**                   |
| Chirp factor 4 | 0.453                             | 5.48**                   |
| Chirp factor 5 | 0.519                             | 4.22*                    |
| GFR factor 3   | 0.616                             | 2.84*                    |
| Chirp factor 3 | 0.639                             | 2.56                     |
| GFR factor 2   | 0.658                             | 2.37                     |
| GFR factor 1   | 0.669                             | 2.25                     |
| GFR factor 4   | 0.849                             | 0.80                     |

<sup>1</sup>Smaller Partial Wilks Lambda indicates stronger contribution to DFA model.

<sup>2</sup>Degrees of freedom = (11,50).

\*\*\* $P < 10^{-6}$ ; \*\* $P < 10^{-4}$ ; \* $P < 0.01$ .
